# Supplementary material for: Structural Motifs Critical for In Vivo Function and Stability of the RecQ-Mediated Genome Instability Protein Rmi1
Source: PubMed Central journal article supplement (PMC4696737; doi:10.1371/journal.pone.0145466), 2015-12-30
Supplement: pone.0145466.s001.pdf [file pone.0145466.s001.pdf]

**S1 Table. Plasmids used in this study**

| Plasmid | Description                          |
|---------|--------------------------------------|
| pKHS621 | <i>pRS415-RM11</i>                   |
| pKHS622 | <i>pRS415-rmi1-F63P</i>              |
| pKHS635 | <i>pRS415-rmi1-F63K</i>              |
| pKHS623 | <i>pRS415-rmi1-E220P</i>             |
| pKHS624 | <i>pRS415-rmi1-A128P</i>             |
| pKHS625 | <i>pRS415-rmi1-A139P</i>             |
| pKHS626 | <i>pRS415-rmi1-P88A</i>              |
| pKHS627 | <i>pRS415-rmi1-Y218P</i>             |
| pKHS634 | <i>pRS415-rmi1-Y218K</i>             |
| pKHS628 | <i>pRS415-rmi1-L7P</i>               |
| pKHS629 | <i>pRS415-rmi1-Y35P</i>              |
| pKHS630 | <i>pRS415-RM11-myc.HIS3MX6</i>       |
| pKHS631 | <i>pRS415-rmi1-F63P-myc.HIS3MX6</i>  |
| pKHS632 | <i>pRS415-rmi1-A128P-myc.HIS3MX6</i> |
| pKHS633 | <i>pRS415-rmi1-Y218P-myc.HIS3MX6</i> |
| pKHS642 | <i>pRS415-rmi1-F63K-myc.HIS3MX6</i>  |
| pKHS643 | <i>pRS415-rmi1-E220P-myc.HIS3MX6</i> |
